# Supplementary material for: Phenotypic and microRNA transcriptomic profiling of the MDA-MB-231 spheroid-enriched CSCs with comparison of MCF-7 microRNA profiling dataset
Source: PeerJ. 2017 Jul 13;5:e3551. doi: 10.7717/peerj.3551 (PMC5511503; doi:10.7717/peerj.3551)
Supplement: Data S10 [file peerj-05-3551-s011.xlsx]

## Sheet: Fig. 3A
	Cell type	Biological Replicate	% stained CD44+/CD24-	SD
	MDA parental	1	27.21
	MDA parental	2	28.96
	MDA Parental	3	25.66
	Means		27.2767	1.65101
	Cell type	Biological Replicate	% stained CD44+/CD24-	SD
	MDA spheroid	1	68.63
	MDA spheroid	2	72.9
	MDA Spheroid	3	69.72
	Means		70.4167	2.21861
* Means data was taken from a minimum of three biological replicates.Data are expressed as means ± standard deviations

## Sheet: Fig. 3B
	Cell type	Biological Replicate	% stained ALDH+VE	SD
	MDA parental	1	1.19
	MDA parental	2	1.53
	MDA Parental	3	2.21
	Means		1.64333	0.519359
	Cell type	Biological Replicate	% stained ALDH+VE	SD
	MDA spheroid	1	28.2
	MDA spheroid	2	30.19
	MDA Spheroid	3	29.89
	Means		29.4267	1.07286
* Means data was taken from a minimum of three biological replicates.Data are expressed as means ± standard deviations

## Sheet: Fig. 4A
	Day	0	3	5	7	10	14	18	21
	MDA		Means %	Means %	Means %	Means %	Means %	Means %	Means %
	Parental	0	16.2703	17.9367	21.87	25.8967	25.8933	27.9633	22.9633
	Spheroid	0	17.4305	21.6093	27.6378	42.143	45.2275	41.3545	43.6443
			SD	SD	SD	SD	SD	SD	SD
			0.900722	0.741103	1.37273	2.00123	1.7614	2.95805	2.96534
			1.13736	0.893666	0.619655	1.73829	1.15783	3.27646	1.9415
* Means data was taken from a minimum of three biological replicates.Data are expressed as means ± standard deviations

## Sheet: Fig. 4B
	Cell type	Biological Replicate	% Migrated cells relative to parental cells	SD
	MDA parental	1	100
	MDA parental	2	100
	MDA Parental	3	100
	Means		100	0
	Cell type	Biological Replicate	% Migrated cells relative to parental cells	SD
	MDA spheroid	1	126.926
	MDA spheroid	2	141.036
	MDA Spheroid	3	122.561
	Means		130.175	9.65643
* Means data was taken from a minimum of three biological replicates.Data are expressed as means ± standard deviations

## Sheet: Fig. 4C
	Cell type	Biological Replicate	% Wound closure	SD
	MDA parental	1	44.3662
	MDA parental	2	45.4633
	MDA Parental	3	59.4723
	Means		49.7673	8.42266
	Cell type	Biological Replicate	% Wound closure	SD
	MDA spheroid	1	55.3839
	MDA spheroid	2	66.2147
	MDA Spheroid	3	62.6897
	Means		61.4294	5.52428
* Means data was taken from a minimum of three biological replicates.Data are expressed as means ± standard deviations

## Sheet: Fig. 4D
	Cell type	Biological Replicate	% Invaded cells relative to parental cells	SD
	MDA parental	1	100
	MDA parental	2	100
	MDA Parental	3	100
	Means		100	0
	Cell type	Biological Replicate	% Invaded cells relative to parental cells	SD
	MDA spheroid	1	122.462
	MDA spheroid	2	131.123
	MDA Spheroid	3	118.285
	Means		123.957	6.54841
* Means data was taken from a minimum of three biological replicates.Data are expressed as means ± standard deviations

## Sheet: Table 1
* Dose-response curves were plotted based on the means data taken from a minimum of three biological replicates.Data are expressed as means ± standard deviations
	Dose-response curves of MDA-MB-231 Parental against three chemotherapeutic drugs						Dose-response curves of MDA-MB-231 Spheroid (3D) against three chemotherapeutic drugs						Dose-response curves of MDA-MB-231 Spheroid (2D) against three chemotherapeutic drugs

## Sheet: Supplementary S7
	Validation of mIRNA-NGS results using qRT-PCR
	(A) MCF-7 spheroid relative to its parental cells
		RT-qPCR data Fold change (Log 2 transformed)		NGS data Fold change
	miRNAs	Mean	SD	Mean
	hsa-miR-15b	-3.353	0.4609	-2.02491
	hsa-miR-34a	-1.5116	0.0848528	-3.96813
	hsa-miR-148a	-2.1272	0.207695	-3.45079
	hsa-miR-628	-5.565	0.0212132	-4.58351
	hsa-miR-196b	-5.304	0.296985	-2.35542
	hsa-miR-125b	-4.7775	0.159099	-2.82568
	hsa-miR-760	-3.2533	0.195633	-10.3129
	hsa-miR-30c	-5.125	0.205061	-2.74056
	hsa-miR-136	3.1575	0.583363	13.9631
	(B) MDA-MB-231 spheroid relative to its parental cells
		RT-qPCR data Fold change (Log 2 transformed)		NGS data Fold change
	miRNAs	Mean	SD	Mean
	hsa-miR-15b	-0.8667	0.188656	-2.87387
	hsa-miR-34a	-2.17	0.173948	-2.07898
	hsa-miR-148a	-3.54	0.181491	-2.03414
	hsa-miR-628	-5.1325	0.512652	-2.14004
	hsa-miR-196b	-2.5144	0.103338	-2.32076
	hsa-miR-204	-5.05	0.707107	-5.69187
	hsa-miR-181a	1.4535	0.0120208	5.80959
	hsa-miR-205	3.505	0.33234	5.763
	* Means data was taken from a minimum of three biological replicates.Data are expressed as means ± standard deviations
