# Supplementary material for: Phenotypic and microRNA transcriptomic profiling of the MDA-MB-231 spheroid-enriched CSCs with comparison of MCF-7 microRNA profiling dataset
Source: PubMed Central journal article supplement (PMC5511503; doi:10.7717/peerj.3551), 2017-07-13
Supplement: peerj-05-3551-s003.pdf [file peerj-05-3551-s003.pdf]

| <b>Cell types</b>                                      | <b>MDA-MB-231<br/>Parental</b> | <b>MDA-MB-231<br/>Spheroid</b> |
|--------------------------------------------------------|--------------------------------|--------------------------------|
| <b>Index tag sequence</b>                              | GTGAAA                         | GTGGCC                         |
| <b>Total reads</b>                                     | 8,435,715                      | 10,979,357                     |
| <b>Reads mapped to miRBase stem-loop<br/>sequences</b> | 5,523,369                      | 1,592,753                      |
| <b>Reads mapped to GRch37.57.ncrna</b>                 | 1,132,822                      | 171,524                        |
| <b>Unique sequences (unannotated)</b>                  | 1,779,524                      | 9,215,080                      |
| <b>Most abundant miRNA</b>                             | miR-21(108885)                 | miR-10a (277306)               |
| <b>Total known miRNA</b>                               | 54,042                         | 29,260                         |
