# Supplementary material for: Phenotypic and microRNA transcriptomic profiling of the MDA-MB-231 spheroid-enriched CSCs with comparison of MCF-7 microRNA profiling dataset
Source: PubMed Central journal article supplement (PMC5511503; doi:10.7717/peerj.3551), 2017-07-13

**A**

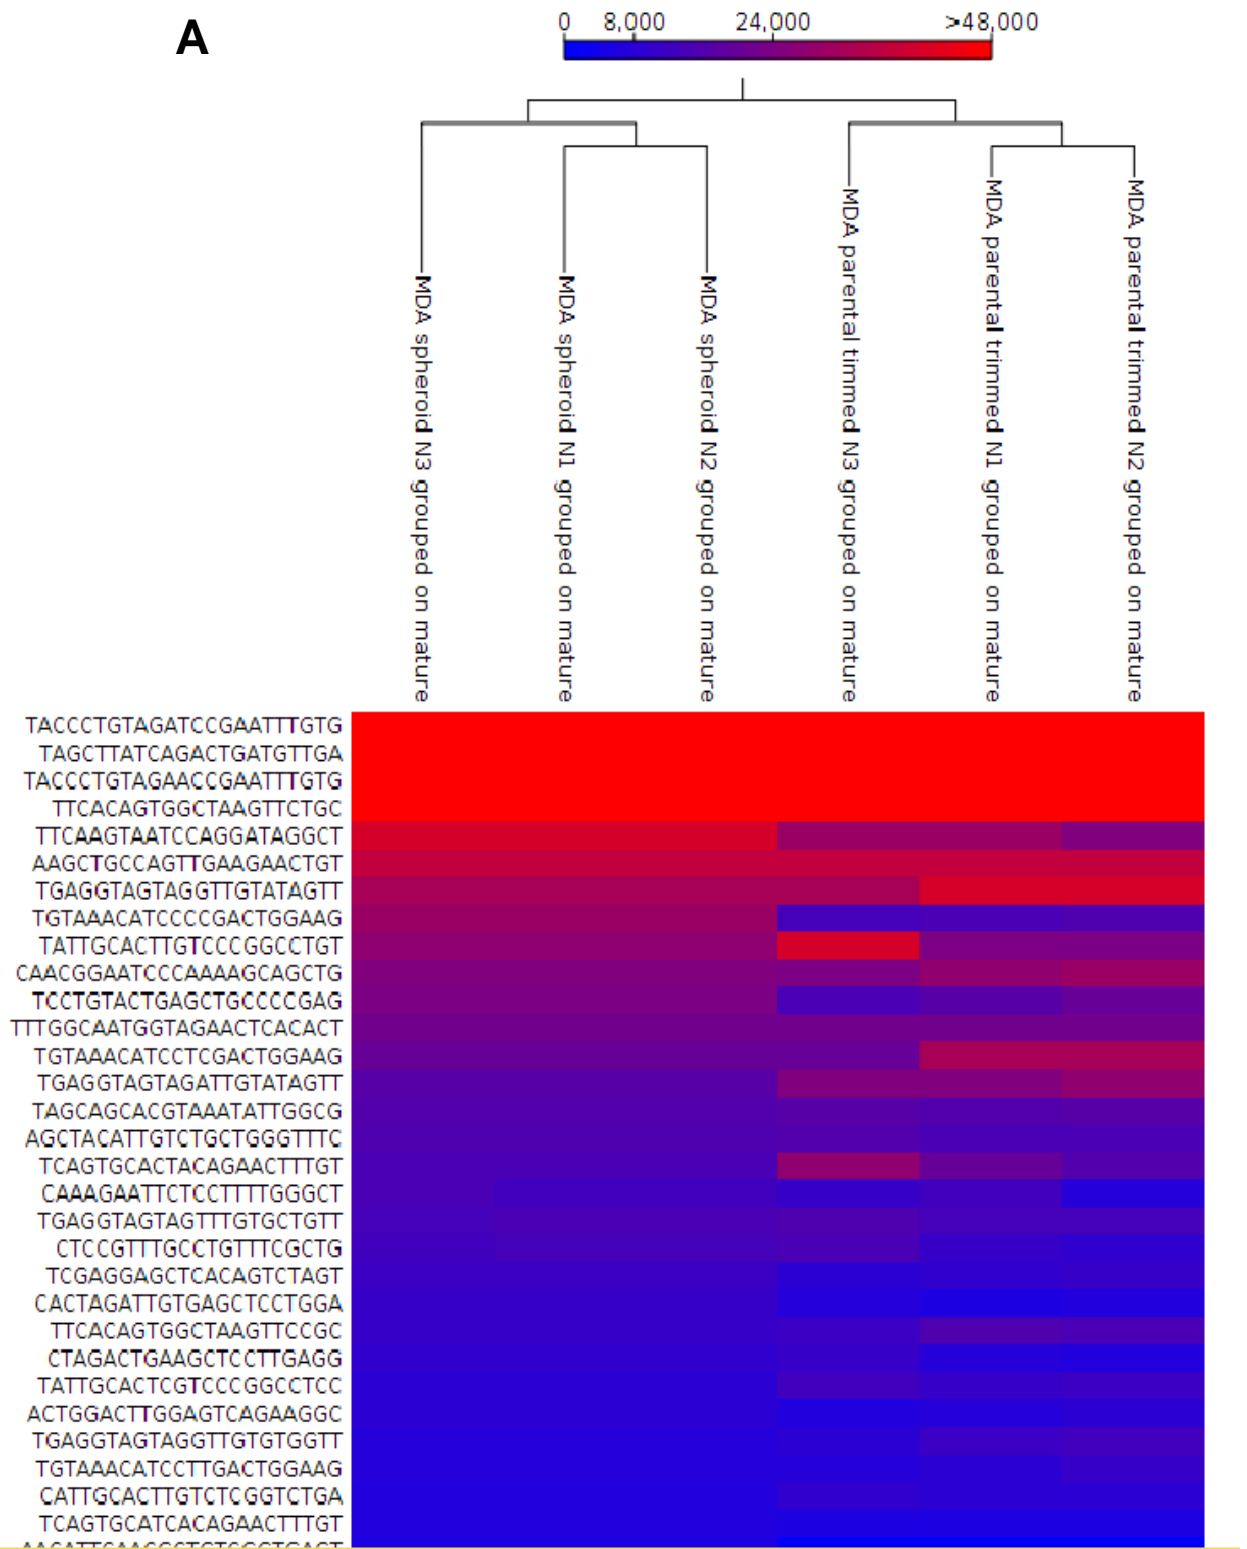

**B**

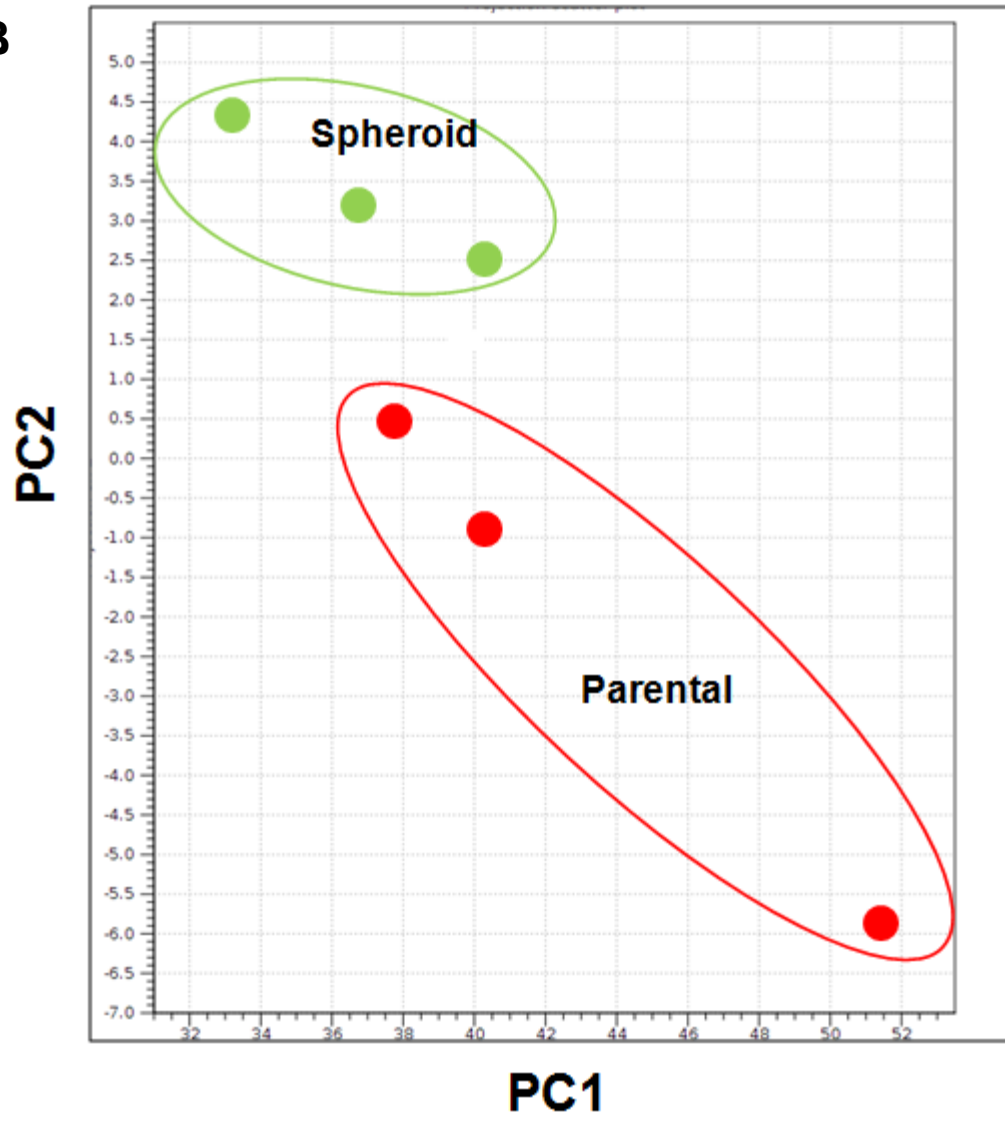

**C****Volcano Plot (Kal's test)**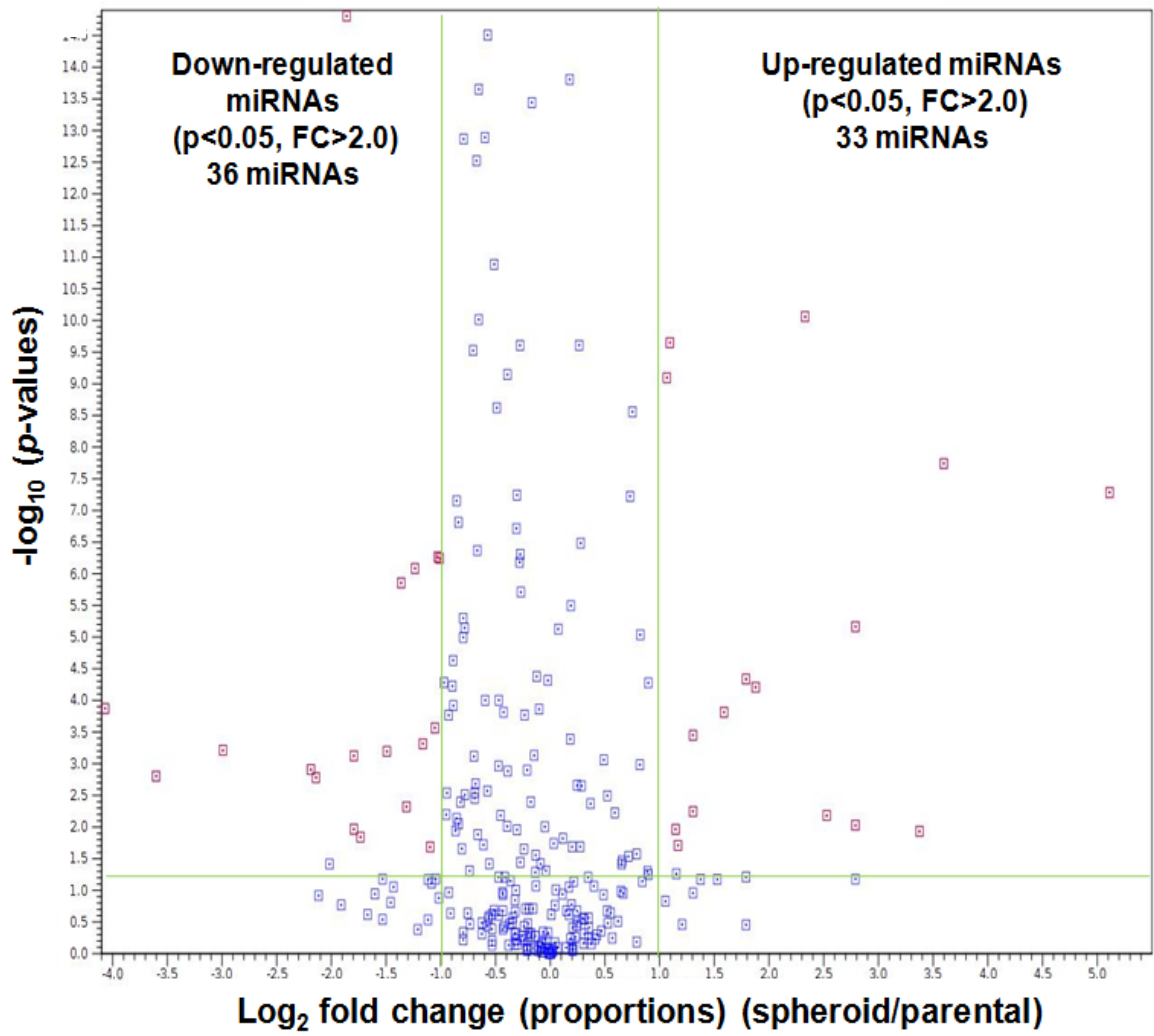

Supplement: peerj-05-3551-s004.pdf [file peerj-05-3551-s004.pdf]
