# Supplementary material for: Phenotypic and microRNA transcriptomic profiling of the MDA-MB-231 spheroid-enriched CSCs with comparison of MCF-7 microRNA profiling dataset
Source: PubMed Central journal article supplement (PMC5511503; doi:10.7717/peerj.3551), 2017-07-13
Supplement: peerj-05-3551-s005.pdf [file peerj-05-3551-s005.pdf]

| <b>miRNAs</b>                    | <b>Kal's Z-test<br/>p-value</b> | <b>Fold change&gt;2<br/>(Spheroid/Parental)</b> |
|----------------------------------|---------------------------------|-------------------------------------------------|
| mir-411                          | 0.0000                          | 41.495                                          |
| mir-127                          | 0.0000                          | 33.838                                          |
| mir-143                          | 0.0000                          | 17.732                                          |
| mir-133a-1//mir-133a-2           | 0.0000                          | 12.103                                          |
| mir-410                          | 0.0117                          | 10.374                                          |
| mir-145                          | 0.0117                          | 10.374                                          |
| mir-126                          | 0.0000                          | 7.060                                           |
| mir-1246                         | 0.0000                          | 6.916                                           |
| mir-342                          | 0.0094                          | 6.916                                           |
| mir-181a-1                       | 0.0000                          | 5.810                                           |
| mir-205                          | 0.0066                          | 5.763                                           |
| mir-210                          | 0.0000                          | 5.676                                           |
| mir-139                          | 0.0000                          | 5.030                                           |
| mir-181a-2//mir-181a-1           | 0.0000                          | 5.019                                           |
| mir-210                          | 0.0000                          | 3.716                                           |
| mir-211                          | 0.0001                          | 3.674                                           |
| mir-181b-1//mir-181b-2           | 0.0000                          | 3.582                                           |
| mir-181c                         | 0.0000                          | 3.458                                           |
| mir-126                          | 0.0000                          | 3.429                                           |
| mir-199a-1//mir-199a-2//mir-199b | 0.0000                          | 3.312                                           |
| mir-1260a                        | 0.0000                          | 3.153                                           |
| mir-1260b                        | 0.0000                          | 2.531                                           |
| mir-365b                         | 0.0004                          | 2.470                                           |
| mir-1291                         | 0.0057                          | 2.470                                           |
| mir-885                          | 0.0000                          | 2.256                                           |
| mir-885                          | 0.0195                          | 2.248                                           |
| mir-664b                         | 0.0109                          | 2.213                                           |
| mir-129-2                        | 0.0000                          | 2.134                                           |
| mir-328                          | 0.0000                          | 2.094                                           |
| mir-30d                          | 0.0000                          | 2.059                                           |
| mir-423                          | 0.0000                          | 2.058                                           |
| mir-191                          | 0.0000                          | -2.014                                          |
| mir-148a                         | 0.0000                          | -2.034                                          |
| mir-147b                         | 0.0000                          | -2.040                                          |
| mir-374b                         | 0.0003                          | -2.078                                          |
| mir-34a                          | 0.0000                          | -2.079                                          |
| mir-24-1//mir-24-2               | 0.0000                          | -2.109                                          |
| mir-628                          | 0.0207                          | -2.140                                          |
| mir-10b                          | 0.0005                          | -2.241                                          |
| mir-196b                         | 0.0000                          | -2.321                                          |

|                           |        |         |
|---------------------------|--------|---------|
| mir-449a                  | 0.0000 | -2.324  |
| mir-345                   | 0.0000 | -2.355  |
| mir-18a                   | 0.0000 | -2.504  |
| mir-6087                  | 0.0000 | -2.571  |
| mir-33b                   | 0.0000 | -2.582  |
| mir-190a                  | 0.0000 | -2.593  |
| let-7a-1//let-7a-3        | 0.0000 | -2.612  |
| mir-93                    | 0.0006 | -2.813  |
| mir-15b                   | 0.0000 | -2.874  |
| mir-184                   | 0.0000 | -2.892  |
| mir-138-2//mir-138-1      | 0.0000 | -2.958  |
| mir-574                   | 0.0000 | -3.218  |
| mir-802                   | 0.0144 | -3.326  |
| mir-222                   | 0.0005 | -3.404  |
| mir-1271                  | 0.0000 | -3.447  |
| mir-200a                  | 0.0108 | -3.470  |
| mir-24-1                  | 0.0007 | -3.470  |
| mir-33a                   | 0.0000 | -3.631  |
| mir-503                   | 0.0017 | -4.410  |
| mir-34c                   | 0.0012 | -4.555  |
| mir-204                   | 0.0000 | -5.692  |
| mir-3613                  | 0.0000 | -6.423  |
| mir-7-1//mir-7-2//mir-7-3 | 0.0000 | -6.941  |
| mir-769                   | 0.0006 | -7.953  |
| mir-190b                  | 0.0016 | -12.146 |
| mir-3074                  | 0.0001 | -16.773 |
