# Supplementary material for: Phenotypic and microRNA transcriptomic profiling of the MDA-MB-231 spheroid-enriched CSCs with comparison of MCF-7 microRNA profiling dataset
Source: PubMed Central journal article supplement (PMC5511503; doi:10.7717/peerj.3551), 2017-07-13
Supplement: peerj-05-3551-s006.pdf [file peerj-05-3551-s006.pdf]

| <b>Name</b>                    | <b>Sequence accession number</b> | <b>Target Sequence</b>  |
|--------------------------------|----------------------------------|-------------------------|
| hsa-miR-19a-3p<br>(Reference)  | MIMAT0000073                     | UGUGCAAUCUAUGCAAACUGA   |
| hsa-miR-200a-3p<br>(Reference) | MIMAT0000682                     | UAACACUGUCUGGUAACGAUGU  |
| hsa-miR-15b-5p                 | MIMAT0000417                     | UAGCAGCACAUCAUGGUUUACA  |
| hsa-miR-34a-5p                 | MIMAT0000255                     | UGGCAGUGUCUUAGCUGGUUGU  |
| hsa-miR-148a-5p                | MIMAT0004549                     | AAAGUUCUGAGACACUCCGACU  |
| hsa-miR-628-5p                 | MIMAT0004809                     | AUGCUGACAUUUUACUAGAGG   |
| hsa-miR-196b-5p                | MIMAT0001080                     | UAGGUAGUUUCCUGUUGUUGGG  |
| hsa-miR-126-5p                 | MIMAT0000444                     | CAUUAUUACUUUUGGUACGCG   |
| hsa-miR-760                    | MIMAT0004957                     | CGGCUCUGGGUCUGUGGGGA    |
| hsa-miR-30c-5p                 | MIMAT0000244                     | UGUAAACAUCCUACACUCUCAGC |
| hsa-miR-136-5p                 | MIMAT0000448                     | ACUCCAUUUGUUUUGAUGAUGGA |
| hsa-miR-204-5p                 | MIMAT0000265                     | UUCCCUUUGUCAUCCU AUGCCU |
| hsa-miR-181a-5p                | MIMAT0000256                     | AACAUUCAACGCUGUCGGUGAGU |
| hsa-miR-205-5p                 | MIMAT0000266                     | UCCUUCAUCCACCGGAGUCUG   |
