# Supplementary material for: Phenotypic and microRNA transcriptomic profiling of the MDA-MB-231 spheroid-enriched CSCs with comparison of MCF-7 microRNA profiling dataset
Source: PubMed Central journal article supplement (PMC5511503; doi:10.7717/peerj.3551), 2017-07-13

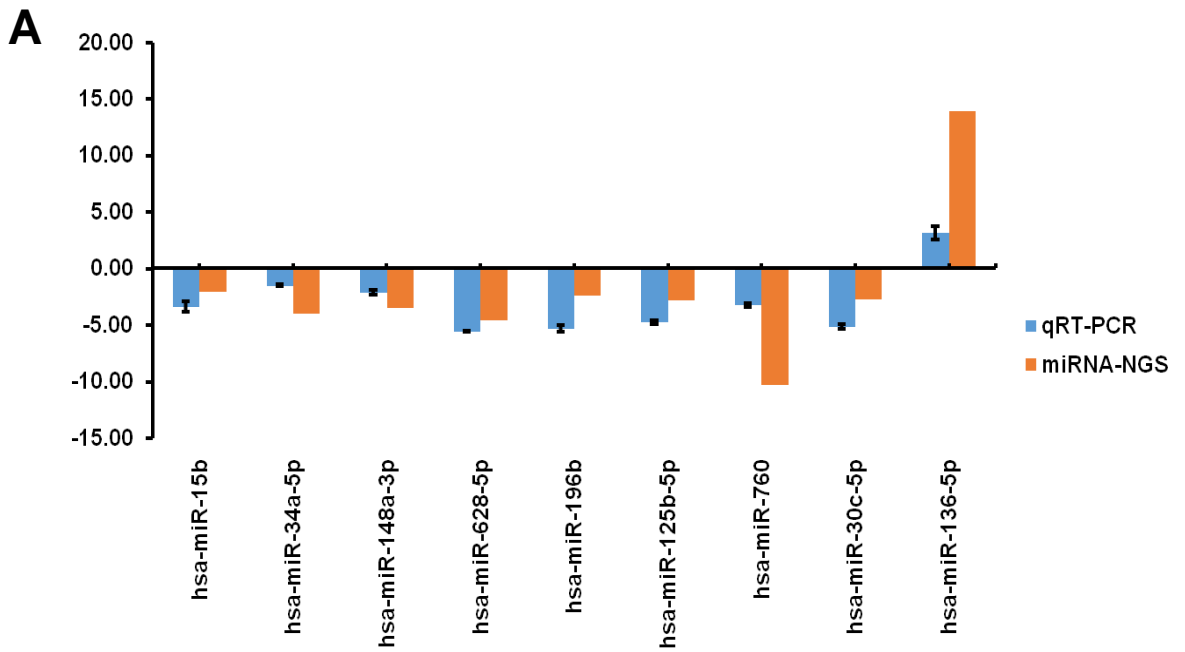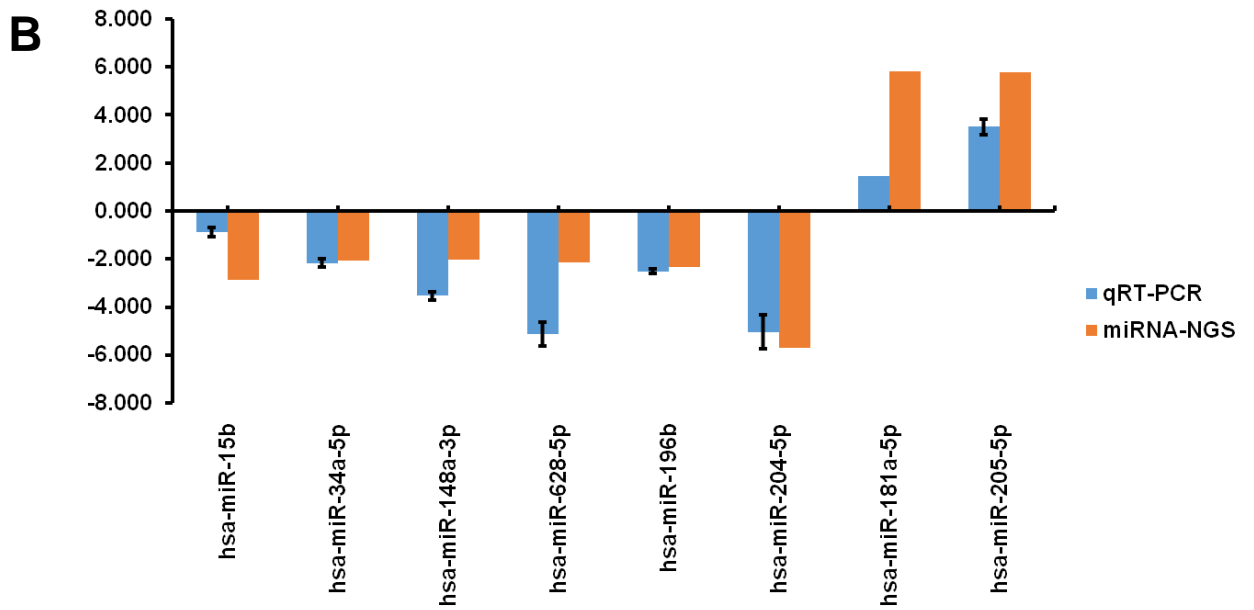

Supplement: peerj-05-3551-s007.pdf [file peerj-05-3551-s007.pdf]
