# Supplementary material for: Phenotypic and microRNA transcriptomic profiling of the MDA-MB-231 spheroid-enriched CSCs with comparison of MCF-7 microRNA profiling dataset
Source: PubMed Central journal article supplement (PMC5511503; doi:10.7717/peerj.3551), 2017-07-13
Supplement: peerj-05-3551-s008.pdf [file peerj-05-3551-s008.pdf]

### MDA-MB-231 Parental

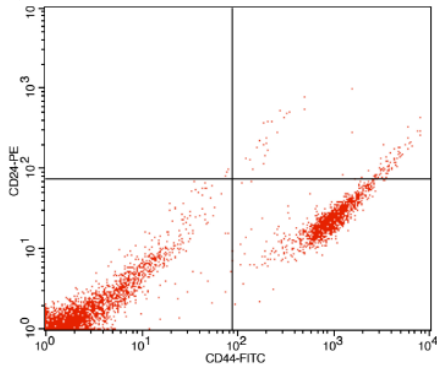

%Gated cell population  
CD44+/CD24- = 27.21%

### MDA-MB-231 Spheroid

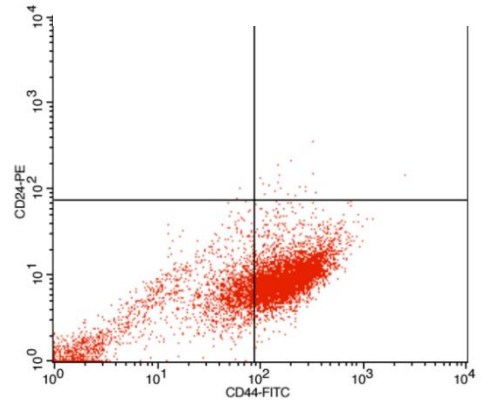

%Gated cell population  
CD44+/CD24- = 68.63%

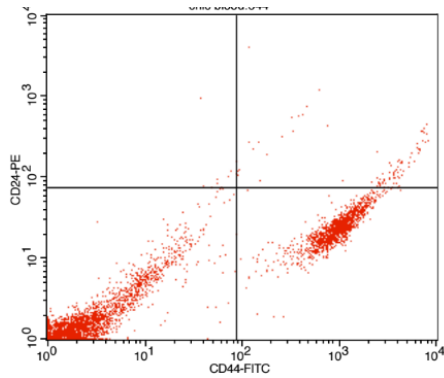

%Gated cell population  
CD44+/CD24- = 28.96%

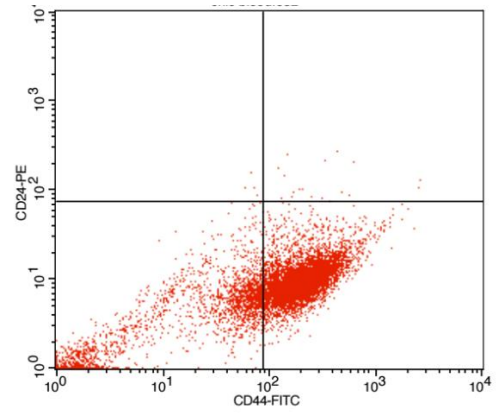

%Gated cell population  
CD44+/CD24- = 72.90%

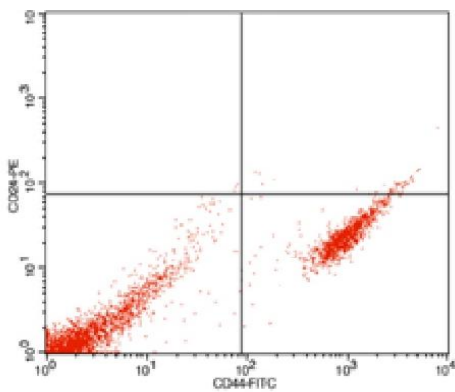

%Gated cell population  
CD44+/CD24- = 25.66%

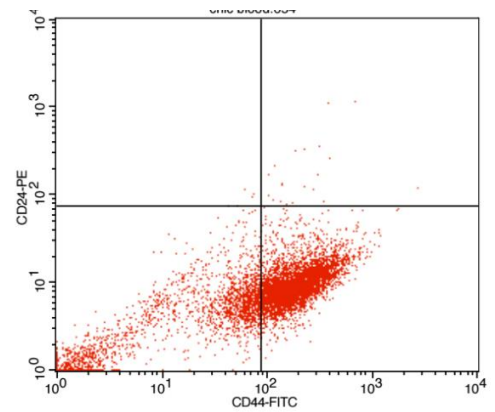

%Gated cell population  
CD44+/CD24- = 69.72%
