# Supplementary material for: Phenotypic and microRNA transcriptomic profiling of the MDA-MB-231 spheroid-enriched CSCs with comparison of MCF-7 microRNA profiling dataset
Source: PeerJ. 2017 Jul 13;5:e3551. doi: 10.7717/peerj.3551 (PMC5511503; doi:10.7717/peerj.3551)
Supplement: Supplemental Information 1 — METADATA spreadsheet submitted to GEO accession number GSE75396. All raw data can be found under the accession number. [file peerj-05-3551-s010.xls]

## Sheet: METADATA TEMPLATE 
# High-throughput sequencing metadata template (version 2.1).
# All fields in this template must be completed.
# Templates containing example data are found in the METADATA EXAMPLES spreadsheet tabs at the foot of this page.
# Field names (in blue on this page) should not be edited. Hover over cells containing field names to view field content guidelines.
# Human data. If there are patient privacy concerns regarding making data fully public through GEO, please submit to NCBI's dbGaP (http://www.ncbi.nlm.nih.gov/gap/) database. dbGaP has controlled access mechanisms and is an appropriate resource for hosting sensitive patient data.
SERIES
# This section describes the overall experiment.
title	miRNA transcriptome profiling of spheroid-enriched cells with cancer stem cell properties in human breast M cell line.	MDA-MB-231
summary	Intro: Spheroid culture especially on MDA cell has been used as in vitro CSC model for anti-CSC drug discovery.			The role of miRNAs in the regulation of mRNA specifically looking at the self-renewal capacity and the drug resistance of the spheroid-enriched CSCs models has not been evaluated. Therefore, a comprehensive profiling of the miRNAs will provide an insight into the regulatory mechanisms associated with breast cancer and CSCs.
summary	Methods: Tumour spheroid of MDA was generated and characterised for the biological features and CSCs characteristic comparing to the monolayer parental MDA cells. Differential expression of miRNA between the spheroid and parental cells was evaluated using next generation sequencing (NGS). The differentially expressed miRNAs were then subjected to target genes predictions, followed pathway analyse…
summary	Results: Spheroids generated from MDA cell line under serum-free condition were found to be enriched with CSCs characteristics. miRNA-NGS analysis revealed 119 differentially expressed miRNAs between the spheroids and parental, with 24 up-regulated and 94 down-regulated. The gene ontology (GO) analysis showed that the predicted genes of the differentially expressed miRNAs were enriched in various…
overall design	miRNA profiles of MDA enriched CSCs spheroids and monolayer cultures were generated in triplicates by deep sequencing using TruSeq small RNA illumina
contributor	Lily,Boo
contributor	Wan Yong, Ho
contributor	Norlaily,Mohd,Ali
contributor	Swee,Keong,Yeap
contributor	Huynh,Ky
contributor	Kok Gan, Chan
contributor	Wai Fong, Yin
contributor	Dilan,Amila,Satharasinghe
contributor	Woan,Charn,Liew
contributor	Sheau Wei, Tan
contributor	Han,Kiat,Ong
contributor	Soon,Keng,Cheong
supplementary file
SRA_center_name_code	[optional]
SAMPLES
# This section lists and describes each of the biological Samples under investgation, as well as any protocols that are specific to individual Samples.
# Additional "processed data file" or "raw file" columns may be included.
Sample name	title	source name	organism	characteristics: Cell source	characteristics: culture condition	characteristics: Culture Dimension	molecule	description	processed data file	raw file	raw file	raw file	raw file	raw file	raw file	raw file	raw file
Sample 1	MDA_P_1	MDA Monolayer (Replicate 1)	Homo sapiens	Estrogen-independent human breast adenocarcinoma	Monolayer	2D	micro RNA		mda parental matureSmall RNA sample sub-size grouped on mature	MDAPARENTALM_GTGAAA_L001_R 1_001	MDAPARENTALM_GTGAAA_L002_R 1_001
Sample 2	MDA_P_2	MDA Monolayer (Replicate 2)	Homo sapiens	Estrogen-independent human breast adenocarcinoma	Monolayer	2D	micro RNA			MOLD_GTGAAA_L001 _R1_001	MOLD_GTGAAA_L002 _R1_001	M2_TAGCTT_L001_ R1_001	M2_TAGCTT_L001_ R1_002
Sample 3	MDA_P_3	MDA Monolayer (Replicate 3)	Homo sapiens	Estrogen-independent human breast adenocarcinoma	Monolayer	2D	micro RNA			M2_TAGCTT_L001_ R1_003	M2_TAGCTT_L002_ R1_001	M2_TAGCTT_L002_ R1_002	M2_TAGCTT_L002_ R1_003
Sample 4	MDA_S_1	MDA Spheroid (Replicate 1)	Homo sapiens	Estrogen-independent human breast adenocarcinoma	Spheroid	3D	micro RNA		mda primary s matureSmall RNA sample MDA Primary S size grouped on mature	MDA1SO_GTGGCC_L001_R 1_001	MDA1SO_GTGGCC_L001_R 1_002	MDA1SO_GTGGCC_L002_R 1_001	MDA1SO_GTGGCC_L002_R 1_002
Sample 5	MDA_S_2	MDA Spheroid (Replicate 2)	Homo sapiens	Estrogen-independent human breast adenocarcinoma	Spheroid	3D	micro RNA			OOLD_GTGGCC_L001 _R1_001	OOLD_GTGGCC_L001 _R1_002	OOLD_GTGGCC_L001 _R1_003
Sample 6	MDA_S_3	MDA Spheroid (Replicate 3)	Homo sapiens	Estrogen-independent human breast adenocarcinoma	Spheroid	3D	micro RNA			OOLD_GTGGCC_L002 _R1_001	OOLD_GTGGCC_L002 _R1_002	OOLD_GTGGCC_L002 _R1_003
PROTOCOLS
# Any of the protocols below which are applicable to only a subset of Samples should be included as additional columns of the SAMPLES section instead.
growth protocol	The monolayer and spheroid MDA cells were cultured in tissue culture-treated flasks and as suspension spheroid respectively. Both are maintained in 5% CO2 humidified incubator.
treatment protocol
extract protocol	Total RNA with retention of small RNAs from the cells were extracted using miRNA easy
library construction protocol	RNA libraries were prepared for sequencing using standard Illumina protocols
library strategy	Illumina Tru-seq small RNA
DATA PROCESSING PIPELINE
# Data processing steps include base-calling, alignment, filtering, peak-calling, generation of normalized abundance measurements etc…
# For each step provide a description, as well as software name, version, parameters, if applicable.
# Include additional steps, as necessary.
data processing step	CLC genomic workbench 7.0
data processing step	Illumina adapter sequences and sequences tags of length less than 17 and more than 27 were removed
data processing step	miRNA sequences were aligned to human genome (homo sapiens GRCh 37.57) and known miRNA database (miRBase-19)
data processing step	Statistical analysis: Bonferroni and FDR corrected
data processing step	Filtering: Significant, above 2; Kalz test: FDR pvalue <0.05; Kalz test: FC abs value>2
genome build	miRBase 19
processed data files format and content	Excel files xlsx containing expression values of miRNAs of monolayer and spheroid MDA
# For each file listed in the "processed data file" columns of the SAMPLES section, provide additional information below.
PROCESSED DATA FILES
file name	file type	file checksum
mda parental matureSmall RNA sample sub-size grouped on mature	xlsx
mda primary s matureSmall RNA sample MDA Primary S size grouped on mature	xlsx
# For each file listed in the "raw file" columns of the SAMPLES section, provide additional information below.
RAW FILES
file name	file type	file checksum	instrument model	read length	single or paired-end
MDAPARENTALM_GTGAAA_L001_R 1_001	fastq		Illumina HiSeq 2000	653470	single
MDAPARENTALM_GTGAAA_L002_R 1_001	fastq		Illumina HiSeq 2000	639210	single
MOLD_GTGAAA_L001 _R1_001	fastq		Illumina HiSeq 2000	906250	single
MOLD_GTGAAA_L002 _R1_001	fastq		Illumina HiSeq 2000	908263	single
M2_TAGCTT_L001_ R1_001	fastq		Illumina HiSeq 2000	4000000	single
M2_TAGCTT_L001_ R1_002	fastq		Illumina HiSeq 2000	4000000	single
M2_TAGCTT_L001_ R1_003	fastq		Illumina HiSeq 2000	1482684	single
M2_TAGCTT_L002_ R1_001	fastq		Illumina HiSeq 2000	4000000	single
M2_TAGCTT_L002_ R1_002	fastq		Illumina HiSeq 2000	4000000	single
M2_TAGCTT_L002_ R1_003	fastq		Illumina HiSeq 2000	1506801	single
MDA1SO_GTGGCC_L001_R 1_001	fastq		Illumina HiSeq 2000	4000000	single
MDA1SO_GTGGCC_L001_R 1_002	fastq		Illumina HiSeq 2000	248371	single
MDA1SO_GTGGCC_L002_R 1_001	fastq		Illumina HiSeq 2000	4000000	single
MDA1SO_GTGGCC_L002_R 1_002	fastq		Illumina HiSeq 2000	154830	single
OOLD_GTGGCC_L001 _R1_001	fastq		Illumina HiSeq 2000	4000000	single
OOLD_GTGGCC_L001 _R1_002	fastq		Illumina HiSeq 2000	4000000	single
OOLD_GTGGCC_L001 _R1_003	fastq			1045488	single
OOLD_GTGGCC_L002 _R1_001	fastq			4000000	single
OOLD_GTGGCC_L002 _R1_002	fastq		Illumina HiSeq 2000	4000000	single
OOLD_GTGGCC_L002 _R1_003	fastq		Illumina HiSeq 2000	1068719	single
# For paired-end experiments, list the 2 associated raw files, and provide average insert size and standard deviation, if known. For SOLiD experiments, list the 4 file names (include "file name 3" and "file name 4" columns).
PAIRED-END EXPERIMENTS
file name 1	file name 2	average insert size	standard deviation

## Sheet: EXAMPLE 1
# High-throughput sequencing metadata template (version 2.1).
# All fields in this template must be completed.
# Templates containing example data are found in the METADATA EXAMPLES spreadsheet tabs at the foot of this page.
# Field names (in blue on this page) should not be edited. Hover over cells containing field names to view field content guidelines.
# Human data. If there are patient privacy concerns regarding making data fully public through GEO, please submit to NCBI's dbGaP (http://www.ncbi.nlm.nih.gov/gap/) database. dbGaP has controlled access mechanisms and is an appropriate resource for hosting sensitive patient data.
SERIES
# This section describes the overall experiment.
title	Genome-wide maps of chromatin state in pluripotent and lineage-committed cells.
summary	We report the application of single-molecule-based sequencing technology for high-throughput profiling of histone modifications in mammalian cells. By obtaining over four billion bases of sequence from chromatin immunoprecipitated DNA, we generated genome-wide chromatin-state maps of mouse embryonic stem cells, neural progenitor cells and embryonic fibroblasts. We find that lysine 4 and lysine 27…
overall design	Examination of 2 different histone modifications in 2 cell types.
contributor	John,B,Goode
contributor	Bradley,Smith
supplementary file
SRA_center_name_code	[optional]
SAMPLES
# This section lists and describes each of the biological Samples under investgation, as well as any protocols that are specific to individual Samples.
# Additional "processed data file" or "raw file" columns may be included.
Sample name	title	source name	organism	characteristics: cell type	characteristics: passages	characteristics: strain	characteristics: ChIP antibody	molecule	description	processed data file	raw file	raw file	raw file	raw file
Sample 1	H3K4me2_ChIPSeq	Neural progenitor cells	Mus musculus	ES-derived neural progenitor cells	15-18	C57BL/6	H3K4me2 (Millipore, 07-030, lot 122116)	genomic DNA		H3K4me2.aligned.txt	H3K4me2.peaks.txt	080716_BI-EAS46_0001_209DH_L1.fastq	080716_BI-EAS46_0001_209DH_L2.fastq	080716_BI-EAS46_0001_209DH_L3.fastq
Sample 2	H3K4me1_ChIPSeq	Neural progenitor cells	Mus musculus	ES-derived neural progenitor cells	15-18	C57BL/6	H3K4me1 (Millipore, 08-034, lot 112345)	genomic DNA		H3K4me1.aligned.txt	H3K4me1.peaks.txt	080716_BI-EAS46_0001_209DH_L4.fastq	080716_BI-EAS46_0001_209DH_L5.fastq	080716_BI-EAS46_0001_209DH_L6.fastq
Sample 3	input DNA	Neural progenitor cells	Mus musculus	ES-derived neural progenitor cells	15-18	C57BL/6	none	genomic DNA		H3K4me2.b.aligned.txt	H3K4me2.b.peaks.txt	080717_BI-EAS46_0001_20DH_L5.fastq	080717_BI-EAS46_0001_20DH_L6.fastq
PROTOCOLS
# Any of the protocols below which are applicable to only a subset of Samples should be included as additional columns of the SAMPLES section instead.
growth protocol	ES cell–derived NS cells were routinely generated by re-plating d 7 adherent neural differentiation cultures (typically 2–3 × 106 cells into a T75 flask) on uncoated plastic in NS-A medium (Euroclone, Milan, Italy) supplemented with modified N2 and 10 ng/ml of both EGF and FGF-2 (NS expansion medium).
treatment protocol
extract protocol	Lysates were clarified from sonicated nuclei and histone-DNA complexes were isolated with antibody.
library construction protocol	Libraries were prepared according to Illumina's instructions accompanying the DNA Sample Kit (Part# 0801-0303). Briefly, DNA was end-repaired using a combination of T4 DNA polymerase, E. coli DNA Pol I large fragment (Klenow polymerase) and T4 polynucleotide kinase. The blunt, phosphorylated ends were treated with Klenow fragment (32 to 52 exo minus) and dATP to yield a protruding 3- 'A' base for…
library strategy	ChIP-Seq
DATA PROCESSING PIPELINE
# Data processing steps include base-calling, alignment, filtering, peak-calling, generation of normalized abundance measurements etc…
# For each step provide a description, as well as software name, version, parameters, if applicable.
# Include additional steps, as necessary.
data processing step	Basecalls performed using CASAVA version 1.4
data processing step	ChIP-seq reads were aligned to the mm9 genome assembly using EasyAlign version 3.2 with the following configurations…
data processing step	Data were filtered using the following specifications…
data processing step	peaks were called using PeaksFind version 2.2 with the following setting: ChIP threshold (0.2), Enrichment Fold (2.5), Rescue Fold (3).
data processing step
genome build	mm9
processed data files format and content	wig files were generated using …; Scores represent …
# For each file listed in the "processed data file" columns of the SAMPLES section, provide additional information below.
PROCESSED DATA FILES
file name	file type	file checksum
H3K4me2.peaks.wig	wig	95cf1d1fa509d871b2ef0bb9fd734c3d
H3K4me1.peaks.wig	wig	8ec6ee3cce10b970e5bfea4e35cdb231
H3K4me2.b.peaks.wig	wig	f8fcd650914ff1a733956d6d06e8b543
# For each file listed in the "raw file" columns of the SAMPLES section, provide additional information below.
RAW FILES
file name	file type	file checksum	instrument model	read length	single or paired-end
080716_BI-EAS46_0001_209DH_L1.fastq	fastq	6cc6ee3cce10b970e5bfea4e35cdb280	Illumina Genome Analyzer	36	single
080716_BI-EAS46_0001_209DH_L2.fastq	fastq	88ceb0e0d056dda9208a03acf9073571	Illumina Genome Analyzer	36	single
080716_BI-EAS46_0001_209DH_L3.fastq	fastq	f2786fedc5106789a2af4014a0e74f00	Illumina Genome Analyzer	36	single
080716_BI-EAS46_0001_209DH_L4.fastq	fastq	d8fcd650914ff1a733956d6d06e8b091	Illumina Genome Analyzer	36	single
080716_BI-EAS46_0001_209DH_L5.fastq	fastq	03839cca2e797b28b9f9371f7b9ca680	Illumina Genome Analyzer	36	single
080716_BI-EAS46_0001_209DH_L6.fastq	fastq	604fbb658413c559511eb6ad2bb1472e	Illumina Genome Analyzer	36	single
080717_BI-EAS46_0001_20DH_L5.fastq	fastq	57cf1d1fa509d871b2ef0bb9fd734c3c	Illumina Genome Analyzer IIx	42	single
080717_BI-EAS46_0001_20DH_L6.fastq	fastq	e5718e1a97690d410464f24f37aaed39	Illumina Genome Analyzer IIx	42	single
# For paired-end experiments, list the 2 associated raw files, and provide average insert size and standard deviation, if known. For SOLiD experiments, list the 4 file names (include "file name 3" and "file name 4" columns).
PAIRED-END EXPERIMENTS
file name 1	file name 2	average insert size	standard deviation

## Sheet: EXAMPLE 2
# High-throughput sequencing metadata template (version 2.1).
# All fields in this template must be completed.
# Templates containing example data are found in the METADATA EXAMPLES spreadsheet tabs at the foot of this page.
# Field names (in blue on this page) should not be edited. Hover over cells containing field names to view field content guidelines.
# Human data. If there are patient privacy concerns regarding making data fully public through GEO, please submit to NCBI's dbGaP (http://www.ncbi.nlm.nih.gov/gap/) database. dbGaP has controlled access mechanisms and is an appropriate resource for hosting sensitive patient data.
SERIES
# This section describes the overall experiment.
title	Next Generation Sequencing Facilitates Quantitative Analysis of Wild Type and Nrl-/- Retinal Transcriptomes
summary	Purpose: Next-generation sequencing (NGS) has revolutionized systems-based analysis of cellular pathways. The goals of this study are to compare NGS-derived retinal transcriptome profiling (RNA-seq) to microarray and quantitative reverse transcription polymerase chain reaction (qRT–PCR) methods and to evaluate protocols for optimal high-throughput data analysis
summary	Methods: Retinal mRNA profiles of 21-day-old wild-type (WT) and neural retina leucine zipper knockout (Nrl−/−) mice were generated by deep sequencing, in triplicate, using Illumina GAIIx. The sequence reads that passed quality filters were analyzed at the transcript isoform level with two methods: Burrows–Wheeler Aligner (BWA) followed by ANOVA (ANOVA) and TopHat followed by Cufflinks. qRT–PCR va…
summary	Results: Using an optimized data analysis workflow, we mapped about 30 million sequence reads per sample to the mouse genome (build mm9) and identified 16,014 transcripts in the retinas of WT and Nrl−/− mice with BWA workflow and 34,115 transcripts with TopHat workflow. RNA-seq data confirmed stable expression of 25 known housekeeping genes, and 12 of these were validated with qRT–PCR. RNA-seq da…
summary	Conclusions: Our study represents the first detailed analysis of retinal transcriptomes, with biologic replicates, generated by RNA-seq technology. The optimized data analysis workflows reported here should provide a framework for comparative investigations of expression profiles. Our results show that NGS offers a comprehensive and more accurate quantitative and qualitative evaluation of mRNA co…
overall design	Retinal mRNA profiles of 21-day old wild type (WT) and Nrl-/- mice were generated by deep sequencing, in triplicate, using Illumina GAIIx.
contributor	Rebecca,A,Smith
contributor	David,Doe
supplementary file
SRA_center_name_code
SAMPLES
# This section lists and describes each of the biological Samples under investgation, as well as any protocols that are specific to individual Samples.
# Additional "processed data file" or "raw file" columns may be included.
Sample name	title	source name	organism	characteristics: strain	characteristics: tissue	characteristics: age	characteristics: genotype	molecule	description	processed data file	raw file	raw file	raw file	raw file	raw file
Sample 1	WT rep1	Retina	Mus musculus	C57BL/6	retina	post natal day 21	wild type	total RNA		WT1.txt	Run123abc.csfasta	Run123abc.qual	2011_01_gfh_qseq.txt	DS18389-7_1.fastq	DS18389-7_2.fastq
Sample 2	WT rep2	Retina	Mus musculus	C57BL/6	retina	post natal day 21	wild type	total RNA		WT2.txt	run454.seq	run454.qual	2011_05_rst_qseq.tar
Sample 3	Nrl-KO rep1	Retina	Mus musculus	C57BL/6	retina	post natal day 21	Nrl-/-	total RNA		mutant1.txt	GAXHYMS02.sff
Sample 4	Nrl-KO rep2	Retina	Mus musculus	C57BL/6	retina	post natal day 21	Nrl-/-	total RNA		mutant2.txt	080717_BI-EAS46_1.fastq	080717_BI-EAS46_2.fastq
PROTOCOLS
# Any of the protocols below which are applicable to only a subset of Samples should be included as additional columns of the SAMPLES section instead.
growth protocol
treatment protocol
extract protocol	Retinas were removed, flash frozen on dry ice, and RNA was harvested using Trizol reagent. Illumina TruSeq RNA Sample Prep Kit (Cat#FC-122-1001) was used with 1 ug of total RNA for the construction of sequencing libraries.
library construction protocol	RNA libraries were prepared for sequencing using standard Illumina protocols
library strategy	RNA-Seq
DATA PROCESSING PIPELINE
# Data processing steps include base-calling, alignment, filtering, peak-calling, generation of normalized abundance measurements etc…
# For each step provide a description, as well as software name, version, parameters, if applicable.
# Include additional steps, as necessary.
data processing step	Illumina Casava1.7 software used for basecalling.
data processing step	Sequenced reads were trimmed for adaptor sequence, and masked for low-complexity or low-quality sequence, then mapped to mm8 whole genome using bowtie v0.12.2 with parameters -q -p 4 -e 100 -y -a -m 10 --best --strata
data processing step	Reads Per Kilobase of exon per Megabase of library size (RPKM) were calculated using a protocol from Chepelev et al., Nucleic Acids Research, 2009. In short, exons from all isoforms of a gene were merged to create one meta-transcript. The number of reads falling in the exons of this meta-transcript were counted and normalized by the size of the meta-transcript and by the size of the library.
data processing step
data processing step
genome build	mm8
processed data files format and content	tab-delimited text files include RPKM values for each Sample ...
# For each file listed in the "processed data file" columns of the SAMPLES section, provide additional information below.
PROCESSED DATA FILES
file name	file type	file checksum
WT.txt	abundance measurements	d8fcd650914ff1a733956d6d06e8b091
WT2.txt	abundance measurements	abcdef123456789abc123456789abc
mutant1.txt	abundance measurements	95cf1d1fa509d871b2ef0bb9fd734c3d
mutant2.txt	abundance measurements	0wd6ee3cce10b970e5bfea4e35cdb987
# For each file listed in the "raw file" columns of the SAMPLES section, provide additional information below.
RAW FILES
file name	file type	file checksum	instrument model	read length	single or paired-end
Run123abc.csfasta	solid_native_csfasta	6cc6ee3cce10b970e5bfea4e35cdb280	AB SOLiD System 3.0	50	single
Run123abc_QV.qual	solid_native_qual	88ceb0e0d056dda9208a03acf9073571	AB SOLiD System 3.0	50	single
2011_01_gfh_qseq.txt	Illumina_native_qseq	95cf1d1fa509d871b2ef0bb9fd734c3d	Illumina HiSeq 2000	72	single
DS18389-7_1.fastq	fastq	95cf1d1fa509d871b2ef0bb9fd734c3d	Illumina HiSeq 2000	50	paired-end
DS18389-7_2.fastq	fastq	0wd6ee3cce10b970e5bfea4e35cdb987	Illumina HiSeq 2000	50	paired-end
run454.seq	454_native_seq	f2786fedc5106789a2af4014a0e74f00	454 GS FLX Titanium	400	single
run454.qual	454_native_qual	d8fcd650914ff1a733956d6d06e8b091	454 GS FLX Titanium	400	single
2011_05_rst_qseq.tar	Illumina_native_qseq	03839cca2e797b28b9f9371f7b9ca680	Illumina Genome Analyzer II	36	single
GAXHYMS02.sff	sff	604fbb658413c559511eb6ad2bb1472e	454 GS 20	36	single
080717_BI-EAS46_1.fastq	fastq	57cf1d1fa509d871b2ef0bb9fd734c3c	Illumina Genome Analyzer IIx	42	paired-end
080717_BI-EAS46_2.fastq	fastq	e5718e1a97690d410464f24f37aaed39	Illumina Genome Analyzer IIx	42	paired-end
# For paired-end experiments, list the 2 associated raw files, and provide average insert size and standard deviation, if known. For SOLiD experiments, list the 4 file names (include "file name 3" and "file name 4" columns).
PAIRED-END EXPERIMENTS
file name 1	file name 2	average insert size	standard deviation
DS18389-7_1.fastq	DS18389-7_2.fastq	222	25
080717_BI-EAS46_1.fastq	080717_BI-EAS46_2.fastq	300	32
