# Supplementary material for: Phenotypic and microRNA transcriptomic profiling of the MDA-MB-231 spheroid-enriched CSCs with comparison of MCF-7 microRNA profiling dataset
Source: PeerJ journal article supplement (doi:10.7717/peerj.3551), 2017-07-13

**A**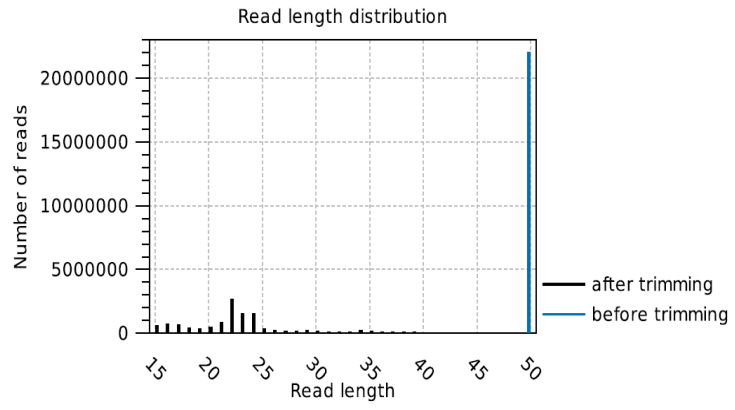**B**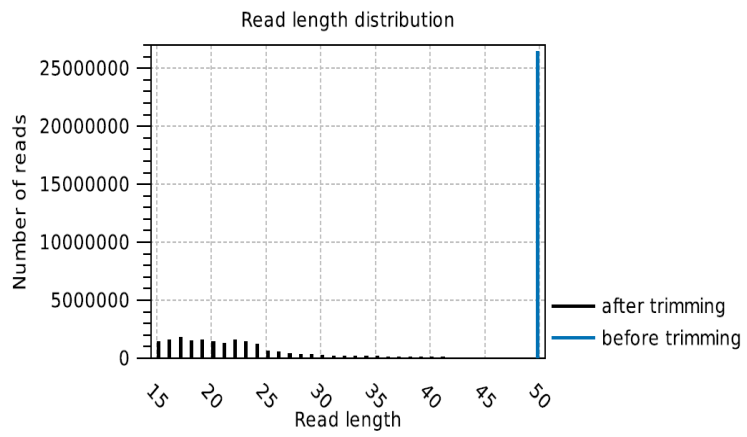

Supplement: Supplementary_Data_Supp_2.pdf [file Supplementary_Data_Supp_2.pdf]
